# Supplementary material
Source: publisher site journal article supplement (https://www.dovepress.com/article/305792)
Supplement: Supplementary file 1 [file get_supplementary_file.php]

**Supplemental Table 1** Regimen of Temozolomide for Different Chemotherapy Regimens

| Chemotherapy Regimen | Temozolomide Regimen |
| --- | --- |
| Concurrent chemoradiotherapy  with adjuvant chemotherapy | 75mg/m2/d (days 1-42), plus 150 or 200mg/m2/d for 5d q28d |
| Mono-chemotherapy | 150 or 200mg/m2/d for 5d q28d |
| Combined chemotherapy |
| Only as adjuvant chemotherapy  after radiotherapy |
| Complex chemotherapy regimen | 75mg/m2/d (days 1-42), plus 150 or 200mg/m2/d for 5d q28d |

**Supplemental Table 2** Types of Toxicities with Temozolomide-Containing Therapies

| Toxicity Type | Details (cases) | N (times) | Number of patients with toxicity | Rate of toxicity occurrence (%) |
| --- | --- | --- | --- | --- |
| Hematological system | Leukopenia (173), thrombocytopenia (100), neutropenia (76), anemia (55), lymphopenia (43), leukocytosis (25), eosinophilia granulocytosis (24), other (60) | 556 | 275 | 29.83 |
| Gastrointestinal system | Nausea (150), emesis (124), constipation (45), diarrhea (8), other (21) | 348 | 195 | 21.15 |
| Liver function | Increased alanine aminotransferase (130), increased aspartate aminotransferase (84), abnormal bilirubin (35), abnormal alkaline phosphatase (8), other (45) | 302 | 139 | 15.08 |
| Other | Dizziness (31), headache (28), loss of appetite (20), hair loss (19), fatigue (15), electrolyte disturbance (14), drowsiness (7), aphasia (3), others (69) | 206 | 178 | 19.31 |

**Supplemental Table 3** Univariate Analysis of the Body-Mass Index (BMI)

| Variable | With toxicity (n=335) | Without toxicity (n=281) | Total (n=616) | χ2 value | *P*-value |
| --- | --- | --- | --- | --- | --- |
|  | N (constituent ratio) | N (constituent ratio) | N (constituent ratio) |
| BMI |  |  |  | 6.705 | 0.082 |
| <18.5 | 37 (11.0%) | 18 (6.4%) | 55 (8.9%) |  |  |
| 18.5-23.9 | 175 (52.2%) | 170 (60.5%) | 345 (56.0%) |  |  |
| 24.0-27.9 | 101 (30.1%) | 80 (28.5%) | 181 (29.4%) |  |  |
| >28.0 | 22 (6.6%) | 13 (4.6%) | 35 (5.7%) |  |  |

**Supplemental Table** **4** Multivariate Analysis of Factors Affecting the Occurrence of Toxicities in the Hematological System

| Variable | B | Standard error | Wald | Significance | OR (95% CI) |
| --- | --- | --- | --- | --- | --- |
| *Chemotherapy regimen*  Complex chemotherapy regimen | 1.567 | 0.400 | 15.341 | <0.001 | 4.790 (2.187-10.491) |
| Only as adjuvant chemotherapy after radiotherapy | 1.670 | 0.687 | 5.912 | 0.015 | 5.313 (1.382-20.421) |
| Combined chemotherapy | 0.528 | 0.344 | 2.356 | 0.125 | 1.696 (0.864-3.331) |
| Concurrent chemoradiotherapy  with adjuvant chemotherapy | 1.860 | 0.599 | 9.642 | 0.002 | 6.423 (1.986-20.780) |
| Mono-chemotherapy |  |  |  |  | Ref (1.00) |
| *Chemotherapy cycle* |  |  |  |  |  |
| 2 | 0.541 | 0.223 | 5.864 | 0.015 | 1.718 (1.109-2.662) |
| 3 | 0.846 | 0.273 | 9.566 | 0.002 | 2.329 (1.363-3.980) |
| 4 | 0.928 | 0.305 | 9.251 | 0.002 | 2.529 (1.391-4.597) |
| 5 | 1.127 | 0.361 | 9.728 | 0.002 | 3.087 (1.520-6.269) |
| 6 | 0.887 | 0.318 | 7.778 | 0.005 | 2.427 (1.302-4.526) |
| 7 | 0.927 | 0.414 | 5.004 | 0.025 | 2.527 (1.122-5.691) |
| 8 or more | 1.790 | 0.422 | 17.954 | <0.001 | 5.990 (2.617-13.710) |
| 1 |  |  |  |  | Ref (1.00) |
| *Clinical stage* |  |  |  |  |  |
| Stage 1-2 | -0.440 | 0.178 | 6.136 | 0.013 | 0.644 (0.454-0.912） |
| Stage 3-4 |  |  |  |  | Ref (1.00) |

OR: odds-ratio, CI: confidence-interval

**Supplemental Table 5** Multivariate Analysis of Factors Affecting the Occurrence of Toxicities in the Gastrointestinal System

| Variable | B | Standard error | Wald | Significance | OR (95% CI) |
| --- | --- | --- | --- | --- | --- |
|
| *Gender* |  |  |  |  |  |
| Female | 0.628 | 0.177 | 12.545 | <0.001 | 1.875（1.324-2.654） |
| Male |  |  |  |  | Ref (1.00) |
| *Age* |  |  |  |  |  |
| <18 | 0.892 | 0.376 | 5.608 | 0.018 | 2.439（1.166-5.101） |
| 18-39 | 0.375 | 0.270 | 1.928 | 0.165 | 1.455（0.857-2.469） |
| 40-59 | -0.158 | 0.239 | 0.435 | 0.509 | 0.854（0.534-1.365） |
| >59 |  |  |  |  | Ref (1.00) |
| *Clinical diagnosis* |  |  |  |  |  |
| Lung cancer | 1.826 | 0.581 | 9.881 | 0.002 | 6.207（1.988-19.374） |
| Melanoma | 0.671 | 0.604 | 1.234 | 0.267 | 1.956（0.599-6.386） |
| Glioma | 0.481 | 0.562 | 0.735 | 0.391 | 1.618（0.538-4.864） |
| Lymphoma | 0.601 | 0.676 | 0.791 | 0.374 | 1.825（0.485-6.866） |
| Others | 1.104 | 0.568 | 3.779 | 0.052 | 3.018（0.991-9.190） |
| Neuroendocrine carcinoma |  |  |  |  | Ref (1.00) |
| *Clinical stage* |  |  |  |  |  |
| Stage 1-2 | -0.535 | 0.210 | 6.518 | 0.010 | 0.586（0.388-0.883） |
| Stage 3-4 |  |  |  |  | Ref (1.00) |

Abbreviations: OR, odds-ratio; CI, confidence-interval.

**Supplemental Table 6** Multivariate Analysis of Factors Affecting the Occurrence of Toxicities in the Lliver

| Variable | B | Standard error | Wald | Significance | OR (95% CI) |
| --- | --- | --- | --- | --- | --- |
|
| *Age* |  |  |  |  |  |
| <18 | -2.363 | 1.045 | 5.114 | 0.024 | 0.094 (0.012-0.730) |
| 18-39 | 0.035 | 0.304 | .013 | 0.909 | 1.036 (0.571-1.879） |
| 40-59 | 0.067 | 0.264 | .065 | 0.798 | 1.070 (0.638-1794） |
| >59 |  |  |  |  | Ref (1.00) |
| *Clinical diagnosis* |  |  |  |  |  |
| Glioma | 1.110 | 0.693 | 2.567 | 0.109 | 3.034 (0.780-11.793） |
| Lung cancer | 0.137 | 0.800 | 0.029 | 0.864 | 1.147 (0.239-5.497） |
| Melanoma | 0.563 | 0.776 | 0.526 | 0.468 | 1.756 (0.384-8.033） |
| Lymphoma | 1.793 | 0.752 | 5.678 | 0.017 | 6.007 (1.375-26.248） |
| Others | 0.304 | 0.742 | 0.167 | 0.683 | 1.355 (0.316-5.805） |
| Neuroendocrine carcinoma |  |  |  |  | Ref (1.00) |
| Chemotherapy regimen |  |  |  |  |  |
| Complex chemotherapy regimen | 1.464 | 0.553 | 7.000 | 0.008 | 4.325 (1.462-12.798） |
| Only as adjuvant chemotherapy  after radiotherapy | 1.440 | 0.968 | 2.211 | 0.137 | 4.221 (0.633-28.162） |
| Combined chemotherapy | 1.215 | 0.506 | 5.763 | 0.016 | 3.370 (1.250-9.0882） |
| Concurrent chemoradiotherapy  with adjuvant chemotherapy | 1.909 | 0.840 | 5.161 | 0.023 | 6.747 (1.300-35.033） |
| Mono-chemotherapy |  |  |  |  | Ref (1.00) |

Abbreviations: OR, odds-ratio; CI, confidence-interval.

**Supplemental Table 7** Discontinuation of Temozolomide due to Toxicity

| Temozolomide regimen | The cycle of discontinuation / Total chemotherapy cycle | Reason for discontinuation | Whether to resume medication |
| --- | --- | --- | --- |
| Concurrent chemoradiotherapy | 1/1 | Bucking | No |
| Temozolomide+Capecitabine | 1/1 | Myelosuppression  , herpes zoster | No |
| Concurrent chemoradiotherapy+4 cycles of temozolomide | 1/5 | Gastrointestinal reaction | Yes |
| Concurrent chemoradiotherapy+5 cycles of temozolomide | 1/6 | Leukopenia, low platelet count | Yes |
| Concurrent chemoradiotherapy | 1/1 | Low platelet count | No |
| Concurrent chemoradiotherapy | 1/1 | Low platelet count, liver damage | No |
| Concurrent chemoradiotherapy | 1/1 | Fever expectoration | No |
| Mono-chemotherapy(Temozolomide) | 1/1 | Oliguria, nausea and vomiting | No |
| Concurrent chemoradiotherapy | 1/1 | Liver damage | Yes |
| Concurrent chemoradiotherapy | 1/1 | Dizziness , fatigue | Yes |
| Concurrent chemoradiotherapy | 1/1 | Low platelet count | No |
| Temozolomide+Capecitabine | 1/1 | Fever, nausea and vomiting | No |
| Concurrent chemoradiotherapy | 1/1 | Glossolalia  , epilepsy | No |
| Concurrent chemoradiotherapy+2 cycles of temozolomide | 3/3 | Liver damage | No |
| Concurrent chemoradiotherapy | 1/1 | Radiodermatitis | Yes |
| Concurrent chemoradiotherapy | 1/1 | Nausea and vomiting, liver damage | Yes |
| Concurrent chemoradiotherapy | 1/1 | Nausea and vomiting | Yes |
